# Supplementary material
Source: Springer Nature journal article supplement (https://www.springermedizin.de/resource/supplementary/12886_2010_194_MOESM3_ESM.pdf/9473556)
Supplement: MOESM3 [file 9473556]

A)

|     |                    |                    |                     |                     |                     |
|-----|--------------------|--------------------|---------------------|---------------------|---------------------|
| 1   | MFSYSYR <b>QSS</b> | <b>ATSSFGGLGG</b>  | <b>GSVRF</b> FGPGVA | <b>FRAPSIHGG</b> S  | <b>GGR</b> GVSVSSA  |
| 51  | RFSVSSSSGG         | YGGGYGGVLT         | ASDGLLAGNE          | KLTMQNLNDR          | <b>LASYLDK</b> VRA  |
| 101 | <b>LEAANGELEV</b>  | <b>K</b> IRDWYQKQG | PGPSRDYSHY          | YTTIQDLRDK          | ILGATIENSR          |
| 151 | IVLQIDNARL         | AADDFRTKFE         | TEQALRMSVE          | ADINGLRR <b>VL</b>  | <b>DELTLART</b> DTL |
| 201 | EMQIEGLKMA         | LAYLKKNHHEE        | EISTLR <b>QGVG</b>  | <b>QGVSV</b> VEVDSA | <b>P</b> GTDLAKILS  |
| 251 | DMRSQYEVMA         | EQNRKDAEAW         | FTRSTEELNR          | EVAGTHEQLQ          | MSRSEVTDLR          |
| 301 | RTLQGLEIEL         | QSRLSMK <b>AAL</b> | <b>EDTLAETEAR</b>   | FGAQLAHIQA          | LISGIEAQLG          |
| 351 | DVRADSERQN         | QEYQRLMDIK         | SRLEQEIATY          | RSLLEGQEDH          | YNNLSASKVL          |
| 401 |                    |                    |                     |                     |                     |

B)

|     |                    |                    |             |            |                    |
|-----|--------------------|--------------------|-------------|------------|--------------------|
| 1   | MSRQASKTSG         | GGSQGFSGRS         | AVVSGSSRMS  | CVAHSGGAGG | GAYGFRSGAG         |
| 51  | GFGSRSLYNL         | GGNKISISIV         | AAGGSRAGGF  | GGGRSSCAFA | GGYGGGFGSG         |
| 101 | YGGGFGGGFG         | GGRGMGGGFG         | GAGGFGGAGG  | FGGAGGFGGP | GGFGSGGGFG         |
| 151 | GPGLSGSPGG         | FPGGGFPGGI         | QEV TINQSLL | QPLNVEIDPQ | IGQVKAQERE         |
| 201 | QIKTLNNKFA         | SFIDKVRFLE         | QQNKVLETKW  | NLLQQOQTSS | ISGTNNLEPL         |
| 251 | FENHINYLR          | YLDNILGERG         | RLDSELKNME  | DLVEDFKKKY | EDEINKRTAA         |
| 301 | ENEFVTLKKD         | VDSAYMNKVE         | LQAKVDALID  | EIDFLRTLVD | AELSQMQSHI         |
| 351 | SDTSVVLSMD         | NNRSLDLDSI         | IAEVRAQYED  | IAQRSKAEAE | ALYQTK <b>LGEL</b> |
| 401 | <b>OTTAGR</b> HGDD | LRNTKSEIEI         | LNRMIQRLRA  | EIEGVKKQNA | NLQTAIAEAE         |
| 451 | QYHEMALKDA         | NAKLQELQAA         | LQQAKDDLAR  | LLRDYQELMN | VKLALDVEIA         |
| 501 | TYRKLLEGEE         | YSRMSGECPS         | AVSISVSSSS  | TRSASAGGYY | GGYGGGMMGG         |
| 551 | LGGGF SAGG         | SGSGFGRGGG         | GGIGGGFGGG  | SSGFSGGSGF | GSISGAR <b>YGV</b> |
| 601 | <b>SGGGFSSASN</b>  | <b>R</b> GGSIKFSQS | SQSSQRYSR   |            |                    |

C)

|     |                    |                    |            |                    |                    |
|-----|--------------------|--------------------|------------|--------------------|--------------------|
| 1   | MIARQQCVRG         | GPRGFSCGSA         | IVGGGKRGAF | SSVSMGGAG          | RCSSGGFGSR         |
| 51  | SLYNLRGNKS         | ISMSVAGSRQ         | GACFGGAGGF | GTGGFGAGGF         | GAGFGTGGFG         |
| 101 | GGFGGSFSGK         | GGPGFPVCPA         | GGIQEVTINQ | SLLTPLHVEI         | DPEIQKVRTE         |
| 151 | EREQIKLLNN         | KFASFIDKVQ         | FLEQQNKVLE | TKWNLLQQQT         | TTTSSKNLEP         |
| 201 | LRFETYLSVLR        | KQLDITLGNK         | GRLQSELKTM | QDSVEDFKTK         | YEEBINKRTA         |
| 251 | AENDFVVLKK         | QVDAAYLNKV         | ELEAKVDSL  | DEINFLKVLV         | DAELSQQMTH         |
| 301 | VSDTSVVLMS         | DNNRNLDLDS         | IAEVRAQYE  | EIAQR <b>SKAEA</b> | <b>EALYQTKV</b> QQ |
| 351 | LQISVDQHD          | NLKNTKSEIA         | ELNRMIQRLR | AEIENIKKQC         | QTLQVSVADA         |
| 401 | EQRGENALKD         | AHSHRVELEA         | ALQQAKEELA | RMLREYQELM         | SVKLALDIEI         |
| 451 | ATYR <b>KLLEGE</b> | <b>EYR</b> MSGECQS | AVSISVSSGS | TSTGGISGGL         | GGSGGFGGLS         |
| 501 | GFGSGSGSGF         | GFGGVSVSSS         | SSKIISTTTL | NKRR               |                    |

D)

|     |                    |                    |                    |                    |                   |
|-----|--------------------|--------------------|--------------------|--------------------|-------------------|
| 1   | MSCRQFSSSY         | LSR <b>SGGGGG</b>  | <b>GLGGGSIRS</b>   | SYSRFSSSGG         | GGGGRF <b>SSS</b> |
| 51  | <b>SGYGGGSSRV</b>  | CGRGGGGSFG         | YSYGGGSGGG         | FSASSLGGGF         | GGGSRGFGGA        |
| 101 | SGGGYSSSGG         | FGGGFGGGSG         | GGFGGGYGSG         | FGGFGGFGGG         | AGGGDGGILT        |
| 151 | ANEKSTMQEL         | NSRLASYLDK         | VQALEEANN          | LENKIQDWYD         | KKGPAAIQKN        |
| 201 | YSPYNTIDD          | LKDQIVDLTV         | GNNK <b>TLLDID</b> | <b>NTR</b> MTLDDFR | IKFEMEQLNR        |
| 251 | <b>QGV DADINGL</b> | <b>R</b> QVDNLTIME | KSDLEMQYET         | LQEELMALKK         | NHKEEMSQLT        |
| 301 | QONSGDVNVE         | INVAPGKDLT         | KTLNDRMQEY         | EQLIAKNRDK         | IENQYETQIT        |
| 351 | QIEHEVSSSG         | QEVQSSAKEV         | TQLRHGVQEL         | EIELQSLSK          | KAALEKSLED        |
| 401 | TKNRYCQQLQ         | MIQEQISNLE         | AQITDVRQEI         | ECQNQEYSLL         | LSIKMRLEKE        |
| 451 | IETYHNLLG          | QGEDFESSGA         | GKIGLGRGG          | SGSGYGRGRS         | <b>GGSGSGYGGG</b> |
| 501 | <b>GSGGGYGGGS</b>  | <b>GSR</b> SGSGGSY | GGGSGSGSGS         | GGGYGGSGSG         | GHSGSGGGGH        |
| 551 | SGGSGGNYGG         | GSGSGGGSGG         | GYGGGSGSRG         | GSGGSHGGGS         | GFGGESGGSY        |
| 601 | GGGEEASGSG         | GGYGGGSGKS         | SHS                |                    |                   |
